# Supplementary material for: High serum uric acid level is a mortality risk factor in peritoneal dialysis patients: a retrospective cohort study
Source: PubMed Central journal article supplement (PMC6670192; doi:10.1186/s12986-019-0379-y), 2019-08-01
Supplement: 12986_2019_379_MOESM1_ESM.pdf [file 12986_2019_379_MOESM1_ESM.pdf]

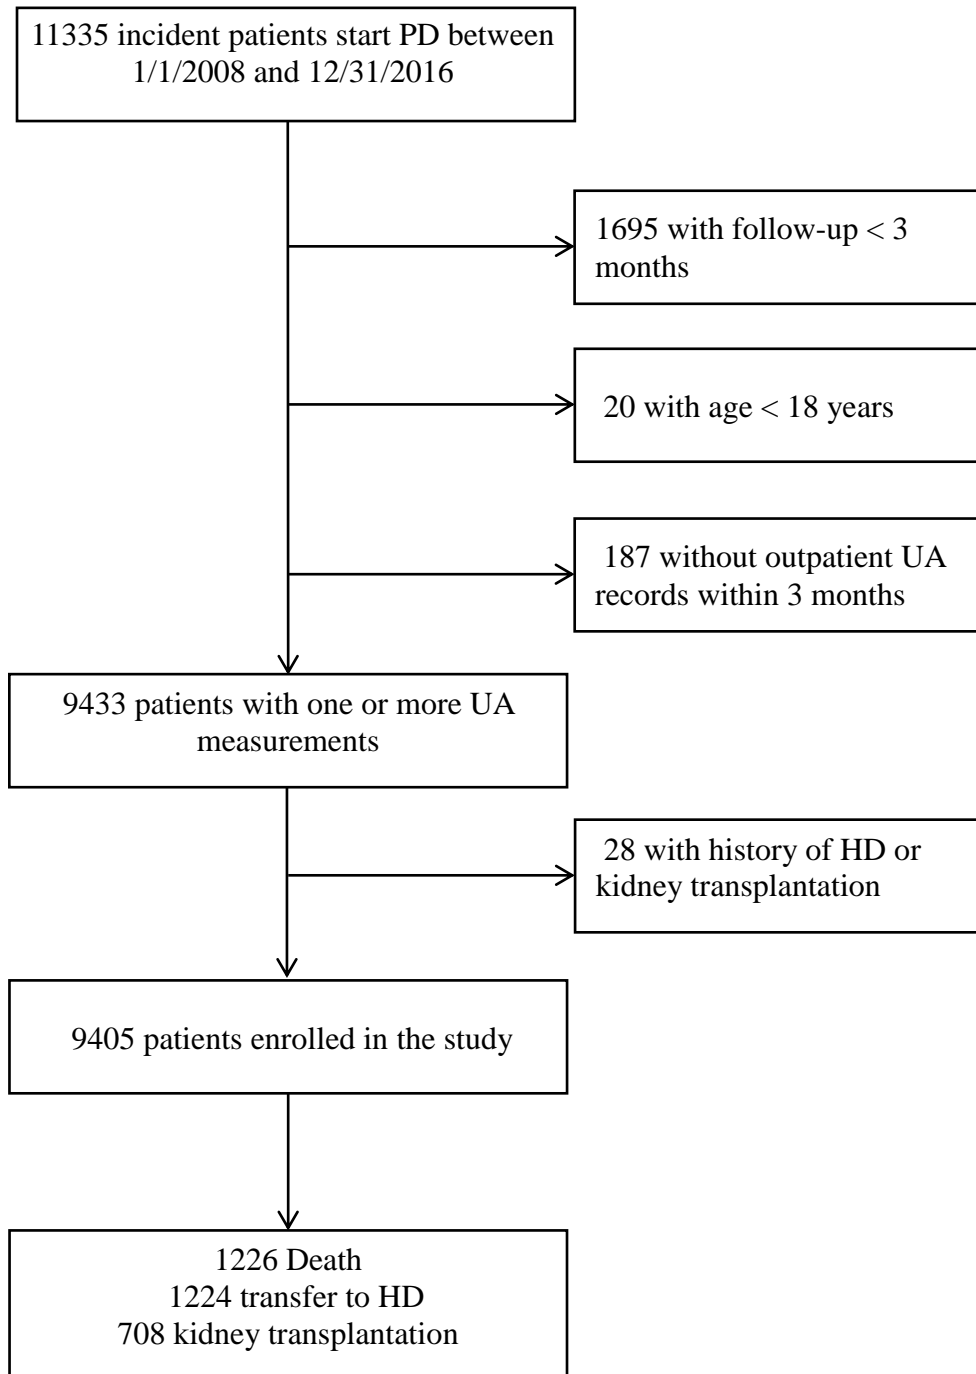

**Supplementary Figure S1.** Flow chart of study enrollment. Between January 2008 and December 2016, a total of 9405 peritoneal dialysis patients were included.
