# Supplementary material for: High serum uric acid level is a mortality risk factor in peritoneal dialysis patients: a retrospective cohort study
Source: PubMed Central journal article supplement (PMC6670192; doi:10.1186/s12986-019-0379-y), 2019-08-01
Supplement: 12986_2019_379_MOESM2_ESM.pdf [file 12986_2019_379_MOESM2_ESM.pdf]

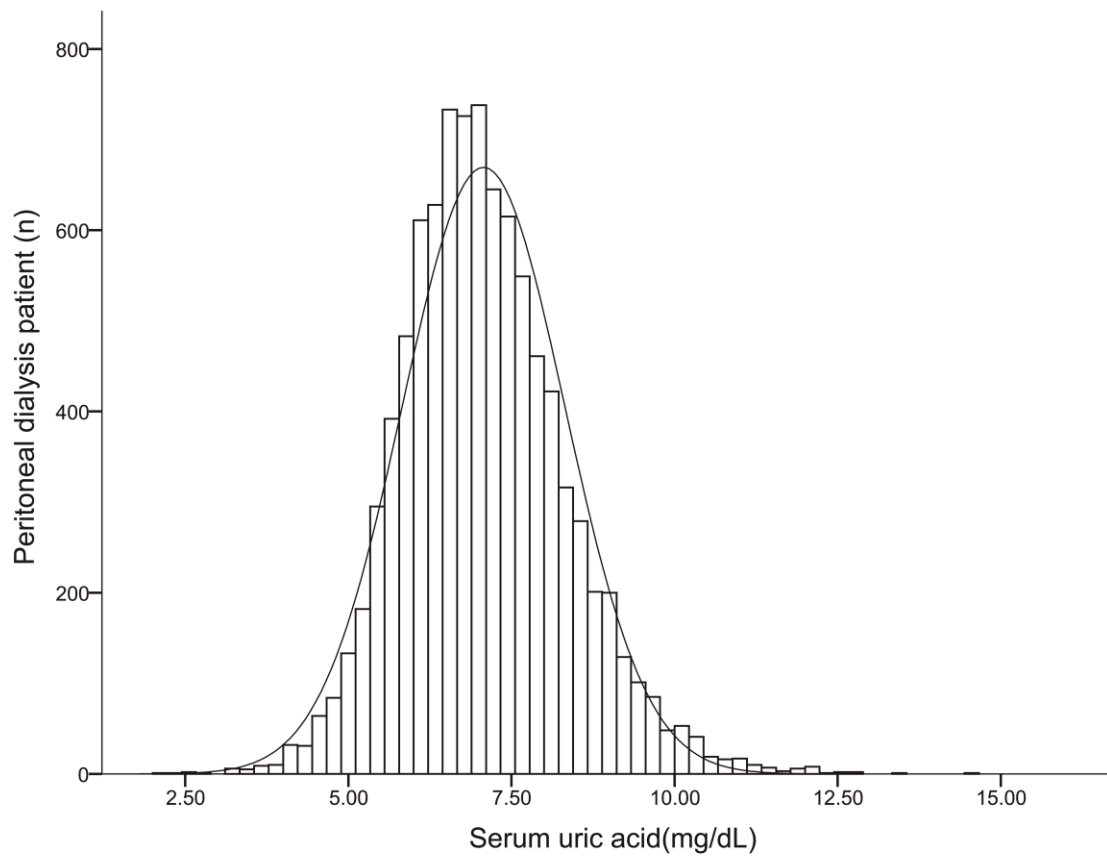

**Supplementary Figure S2.** Distribution of serum uric acid concentrations (n = 9,405). Mean, 7.07 mg/dL; standard deviation, 1.246 mg/dL.
