# Supplementary material for: High serum uric acid level is a mortality risk factor in peritoneal dialysis patients: a retrospective cohort study
Source: PubMed Central journal article supplement (PMC6670192; doi:10.1186/s12986-019-0379-y), 2019-08-01
Supplement: 12986_2019_379_MOESM4_ESM.pdf [file 12986_2019_379_MOESM4_ESM.pdf]

**Supplementary Table S1.** Baseline parameters affected serum uric acid levels.

| Variants                         | Serum uric acid level |         |          |         |
|----------------------------------|-----------------------|---------|----------|---------|
|                                  | Unadjusted            |         | Adjusted |         |
|                                  | B                     | P value | B        | P value |
| Age (yr)                         | -0.009                | <0.001  | -0.004   | 0.001   |
| Sex (ref. men)                   | -0.399                | <0.001  | -0.341   | <0.001  |
| BMI (kg/m <sup>2</sup> )         | 0.053                 | <0.001  | 0.034    | <0.001  |
| Hemoglobin (g/dL)                | -0.004                | <0.001  | 0.001    | 0.435   |
| Albumin (g/dL)                   | 0.028                 | <0.001  | 0.024    | <0.001  |
| Baseline creatinine (mg/dL)      | 0.051                 | <0.001  | -0.013   | 0.021   |
| Calcium (mmol/L)                 | -0.439                | <0.001  | -0.296   | 0.001   |
| Phosphorus (mmol/L)              | 0.869                 | <0.001  | 0.852    | <0.001  |
| Potassium (mmol/L)               | 0.314                 | <0.001  | 0.033    | 0.301   |
| Natrium (mmol/L)                 | 0.045                 | <0.001  | 0.023    | 0.001   |
| PTH (pg/mL)                      | 0.000                 | <0.001  | 0.000    | 0.551   |
| RRF (mL/min/1.73m <sup>2</sup> ) | 0.000                 | <0.001  | 0.000    | 0.496   |
| FPG (mmol/L)                     | -0.064                | <0.001  | -0.035   | <0.001  |
| DM(yes)                          | -0.169                | <0.001  | -0.077   | 0.094   |
| CVD (yes)                        | -0.077                | 0.189   | -0.042   | 0.481   |
| Follow-up duration(mo)           | -0.005                | <0.001  | -0.005   | <0.001  |

Note: B, regression coefficient with serum uric acid levels. Adjusted for age, sex, BMI, hemoglobin, albumin, Baseline creatinine, calcium, phosphorus, Potassium, Natrium, PTH, RRF, FPG, DM, CVD, Follow-up duration.

Abbreviations: BMI, body mass index; PTH, Parathyroid hormone; RRF, Residual renal function; FPG, fasting plasma glucose; DM, diabetes mellitus; CVD, cardiovascular disease.
