# Supplementary material for: High serum uric acid level is a mortality risk factor in peritoneal dialysis patients: a retrospective cohort study
Source: PubMed Central journal article supplement (PMC6670192; doi:10.1186/s12986-019-0379-y), 2019-08-01
Supplement: 12986_2019_379_MOESM5_ESM.pdf [file 12986_2019_379_MOESM5_ESM.pdf]

**Supplementary Table S2.** Hazard ratios of baseline parameters for all-cause mortality risk factors.

| Variants                         | Univariate |                       |         |
|----------------------------------|------------|-----------------------|---------|
|                                  | B          | Hazard ratio (95% CI) | P value |
| Age (yr)                         | 0.062      | 1.064(1.059-1.069)    | <0.001  |
| Sex (ref. men)                   | 0.081      | 1.085(0.969-1.214)    | 0.156   |
| BMI (kg/m <sup>2</sup> )         | 0.014      | 1.015(0.995-1.034)    | 0.147   |
| Hemoglobin (g/dL)                | -0.032     | 0.969(0.964-0.973)    | <0.001  |
| Albumin (g/dL)                   | -0.108     | 0.897(0.888-0.906)    | <0.001  |
| Baseline creatinine (mg/dL)      | -0.138     | 0.871(0.856-0.887)    | <0.001  |
| Calcium (mmol/L)                 | -2.514     | 0.081(0.061-0.107)    | <0.001  |
| Phosphorus (mmol/L)              | -0.823     | 0.439(0.368-0.523)    | <0.001  |
| Potassium (mmol/L)               | -0.602     | 0.548(0.480-0.624)    | <0.001  |
| Sodium (mmol/L)                  | -0.127     | 0.880(0.860-0.901)    | <0.001  |
| PTH (pg/mL)                      | -0.002     | 0.998(0.998-0.998)    | <0.001  |
| RRF (mL/min/1.73m <sup>2</sup> ) | 0.070      | 1.073(1.054-1.092)    | <0.001  |
| FPG (mmol/L)                     | 0.151      | 1.163(1.136-1.189)    | <0.001  |
| DM(yes)                          | 0.578      | 1.783(1.530-2.078)    | <0.001  |
| CVD (yes)                        | 0.625      | 1.869(1.539-2.269)    | <0.001  |

Note: B, regression coefficient.

Abbreviations: BMI, body mass index; PTH, Parathyroid hormone; RRF, Residual renal function; FPG, fasting plasma glucose; DM, diabetes mellitus; CVD, cardiovascular disease.
