# Supplementary material for: High serum uric acid level is a mortality risk factor in peritoneal dialysis patients: a retrospective cohort study
Source: PubMed Central journal article supplement (PMC6670192; doi:10.1186/s12986-019-0379-y), 2019-08-01
Supplement: 12986_2019_379_MOESM6_ESM.pdf [file 12986_2019_379_MOESM6_ESM.pdf]

**Supplementary Table S3.** Hazard ratios of baseline parameters for cardiovascular mortality risk factors.

| Variants                         | Univariate |                       |         |
|----------------------------------|------------|-----------------------|---------|
|                                  | B          | Hazard ratio (95% CI) | P value |
| Age (yr)                         | 0.054      | 1.055(1.048-1.063)    | <0.001  |
| Sex (ref. men)                   | 0.088      | 1.092(0.918-1.300)    | 0.318   |
| BMI (kg/m <sup>2</sup> )         | 0.056      | 1.057(1.028-1.087)    | <0.001  |
| Hemoglobin (g/dL)                | -0.030     | 0.970(0.963-0.977)    | <0.001  |
| Albumin (g/dL)                   | -0.106     | 0.900(0.886-0.914)    | <0.001  |
| Baseline creatinine (mg/dL)      | -0.122     | 0.885(0.861-0.910)    | <0.001  |
| Calcium (mmol/L)                 | -2.508     | 0.081(0.053-0.126)    | <0.001  |
| Phosphorus (mmol/L)              | -0.475     | 0.622(0.478-0.808)    | <0.001  |
| Potassium (mmol/L)               | -0.337     | 0.714(0.584-0.872)    | 0.001   |
| Sodium (mmol/L)                  | -0.114     | 0.893(0.860-0.927)    | <0.001  |
| PTH (pg/mL)                      | -0.002     | 0.998(0.998-0.999)    | <0.001  |
| RRF (mL/min/1.73m <sup>2</sup> ) | 0.082      | 1.085(1.057-1.114)    | <0.001  |
| FPG (mmol/L)                     | 0.172      | 1.188(1.151-1.226)    | <0.001  |
| DM(yes)                          | 0.777      | 2.175(1.743-2.715)    | <0.001  |
| CVD (yes)                        | 1.004      | 2.730(2.108-3.535)    | <0.001  |

Note: B, regression coefficient.

Abbreviations: BMI, body mass index; PTH, Parathyroid hormone; RRF, Residual renal function; FPG, fasting plasma glucose; DM, diabetes mellitus; CVD, cardiovascular disease.
